# Supplementary material for: Optical Diffraction Tomography and Raman Confocal Microscopy for the Investigation of Vacuoles Associated with Cancer Senescent Engulfing Cells
Source: Preprints.org preprint supplement (doi:10.20944/preprints202310.0573.v1), 2023-10-10
Supplement: Supplementary file 1 [file supplementary]

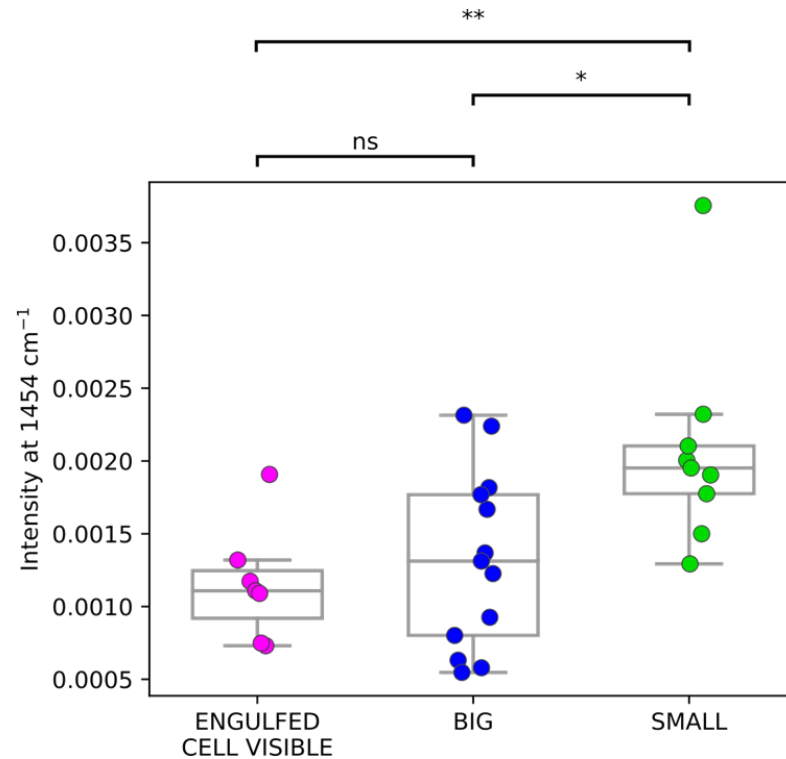

**Figure S1.** Box plot showing the intensity at the 1454 cm<sup>-1</sup> peak in the average Raman spectra of *engulfed cell visible* (pink), *big* (blue), and *small* (green) vacuoles. The Mann-Whitney U test shows significant differences in the intensity between engulfed cell visible and small ( $p < 0.01$ ) and between big and small ( $p < 0.05$ ).

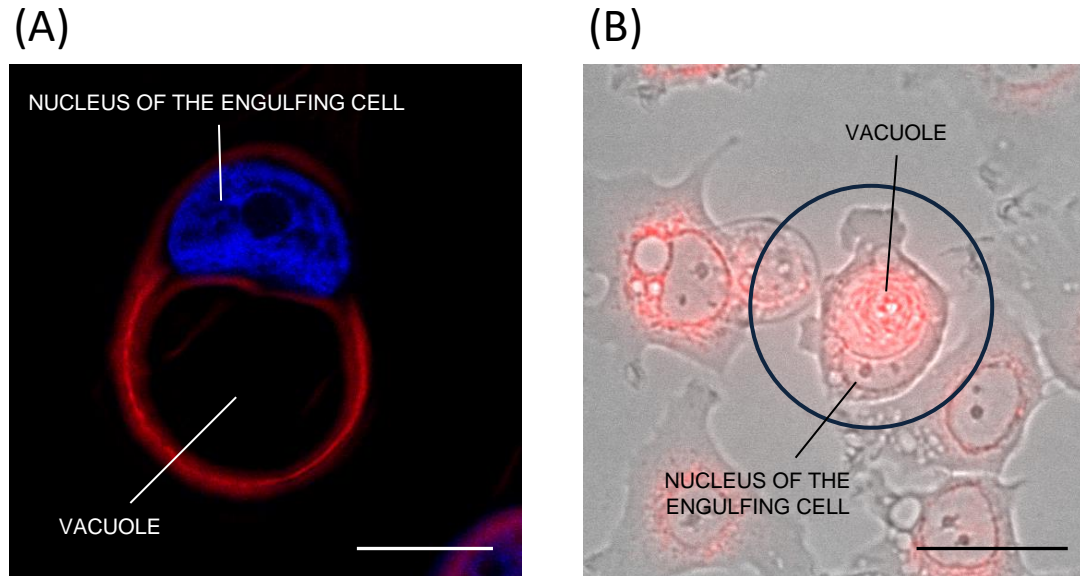

**Figure S2.** Representative images of senescent MCF7 vacuole-holding cells stained for lysosomes with Lysotracker. The picture (A) was obtained with a confocal microscope in fluorescent mode. In blue (DAPI staining) is the engulfing cell nucleus. Scale bar: 25  $\mu\text{m}$ . The picture (B) was obtained in brightfield mode. The circle indicates the engulfing cell. Scale bar: 50  $\mu\text{m}$ .
